# Supplementary material for: Efferocytosis is impaired in Gaucher macrophages
Source: PubMed Central journal article supplement — Haematologica. 2016 Dec 23;102(4):656–65. doi: 10.3324/haematol.2016.155093 (PMC5395106; doi:10.3324/haematol.2016.155093), 2017-04
Supplement: 2016_155093-Disclosures_and_Contributions.pdf [file 2016_155093-Disclosures_and_Contributions.pdf]

Haematologica  
HAEMATOL/2016/155093  
Version 3

Efferocytosis is impaired in Gaucher macrophages

Elma Aflaki, Daniel K. Borger, Richard J. Grey, Martha Kirby, Stacie Anderson, Grisel Lopez, and Ellen Sidransky

Disclosures: The authors have no conflicts to disclose relevant to this work. The Sidransky laboratory received research funding under a NIH Cooperative Research and Development Award from Merck Neurosciences, not related to the current work. There was no personal compensation received.

Contributions: EA conceived of the study, performed experiments, analyzed data and drafted the manuscript. DKB performed experiments and contributed to writing the manuscript. GL evaluated the patients and collected the patient samples. SA and MK performed flow cytometry. RJG genotyped all samples. ES supervised the project, analyzed the data and prepared the manuscript.
